# Supplementary material for: Targeting Cytotoxic Agents through EGFR-Mediated Covalent Binding and Release
Source: PubMed Central journal article supplement (PMC10510387; doi:10.1021/acs.jmedchem.3c00845), 2023-08-30
Supplement: jm3c00845_si_002.pdf [file jm3c00845_si_002.pdf]

## Supporting Information

# Targeting cytotoxic agents through EGFR-mediated covalent binding and release

Pasquale A. Morese,<sup>a</sup> Nahoum Anthony,<sup>b</sup> Michael Bodnarchuk,<sup>c</sup> Claire Jennings,<sup>b</sup> Mathew P. Martin,<sup>b</sup> Richard A. Noble,<sup>b</sup> Nicole Phillips,<sup>b</sup> Huw D. Thomas,<sup>b</sup> Lan Z. Wang, Andrew Lister,<sup>c</sup> Martin E. M. Noble,<sup>b</sup> Richard A. Ward,<sup>c</sup> Stephen R. Wedge,<sup>b</sup> Hannah L. Stewart<sup>a\*</sup> and Michael J. Waring.<sup>a\*</sup>

<sup>a</sup> Cancer Research Horizons Therapeutic Innovation, Newcastle University Centre for Cancer, Chemistry, School of Natural and Environmental Sciences, Newcastle University, Bedson Building, Newcastle upon Tyne, NE1 7RU, U.K.

<sup>b</sup> Cancer Research Horizons Therapeutic Innovation, Newcastle University Centre for Cancer, Translational and Clinical Research Institute, Faculty of Medical Sciences, Paul O’Gorman Building, Newcastle University, Newcastle upon Tyne, NE2 4HH, U.K.

<sup>c</sup> Oncology iMed, R&D, AstraZeneca, Cambridge, CB4 0WG, UK.

Corresponding author emails: hannah.stewart@ncl.ac.uk; mike.waring@ncl.ac.uk

## Contents

|                                                       |     |
|-------------------------------------------------------|-----|
| Supplementary Figures .....                           | S2  |
| NMR Spectra .....                                     | S7  |
| Assignment of 5FU addition – Compound <b>16</b> ..... | S10 |
| Analytical HPLC Traces .....                          | S13 |

## Supplementary Figures

**Table S1.** WT and DM EGFR potencies determined by TR FRET (n=1, 2 technical replicates).

| Compound  | DM EGFR pIC <sub>50</sub> | WT EGFR pIC <sub>50</sub> |
|-----------|---------------------------|---------------------------|
| <b>30</b> | 6.8                       | 5.7                       |
| <b>35</b> | 5.5                       | <4.0                      |
| <b>39</b> | 3.7                       | <4.0                      |
| <b>48</b> | 6.7                       | 6.6                       |
| <b>49</b> | 6.4                       | 5.6                       |
| <b>50</b> | 6.6                       | 5.9                       |
| <b>51</b> | n.d.                      | 6.6                       |

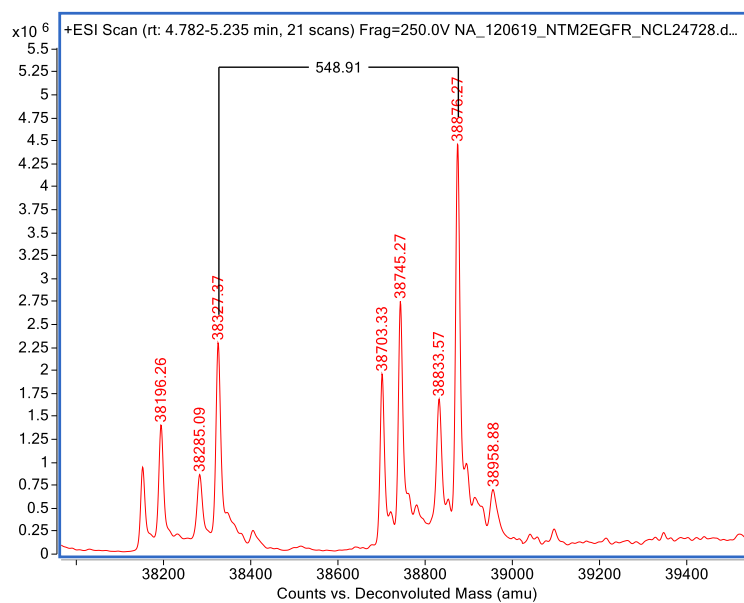

**Figure S1.** Protein mass spectrometry spectrum showing the mass addition of 548 to the protein, corresponding to the addition of the intact hybrid **30** without 5FU release.

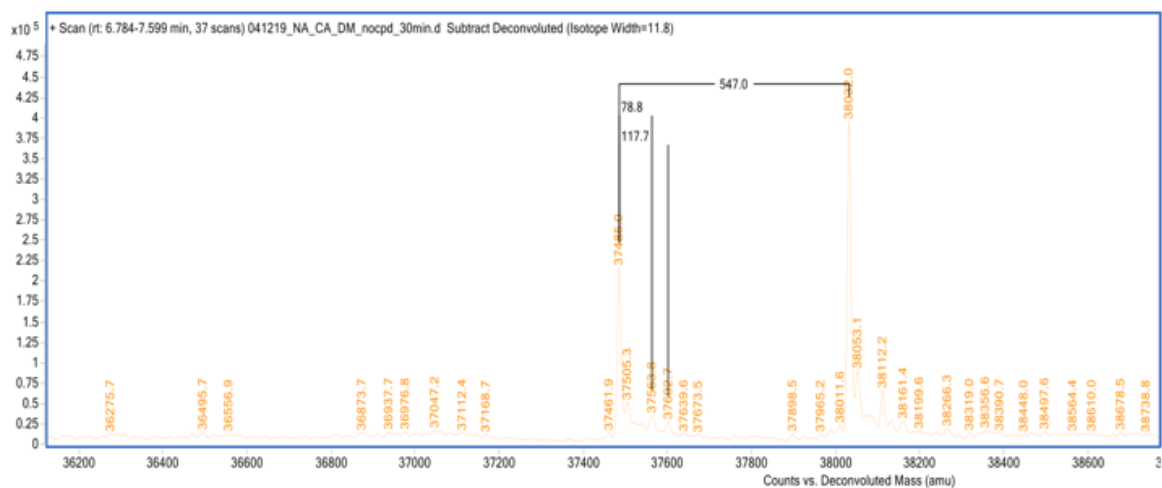

**Figure S2.** Protein mass spectrometry spectrum showing the mass addition of 547 to the protein, corresponding to the addition of the intact hybrid **35** without 5FU release.

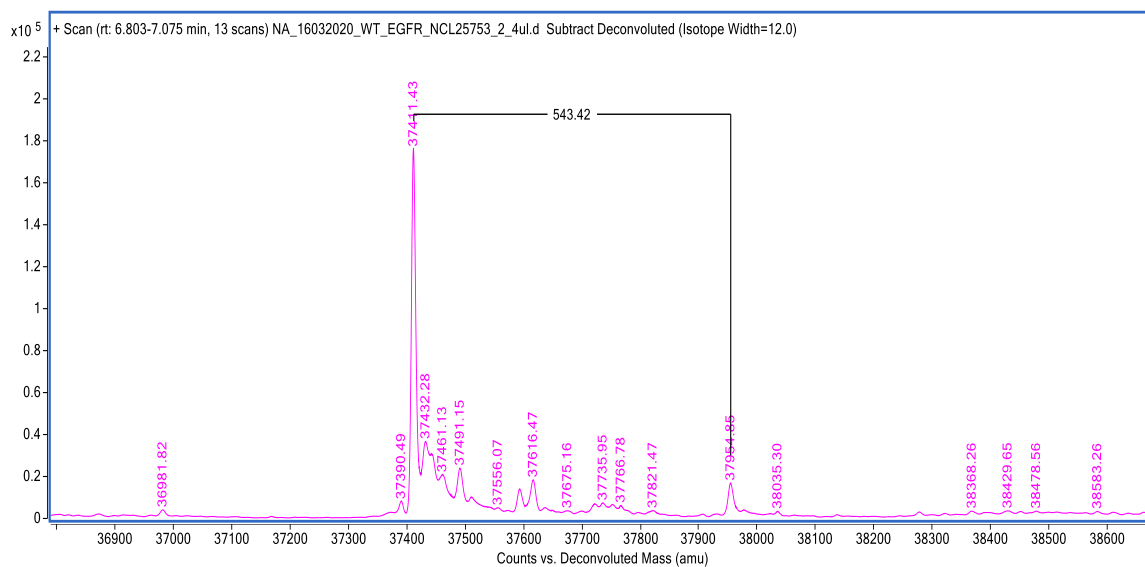

**Figure S3.** Protein mass spectrometry spectrum showing the addition of 543 Daltons to the protein, corresponding to the addition of the hybrid **39** without release of 5FU.

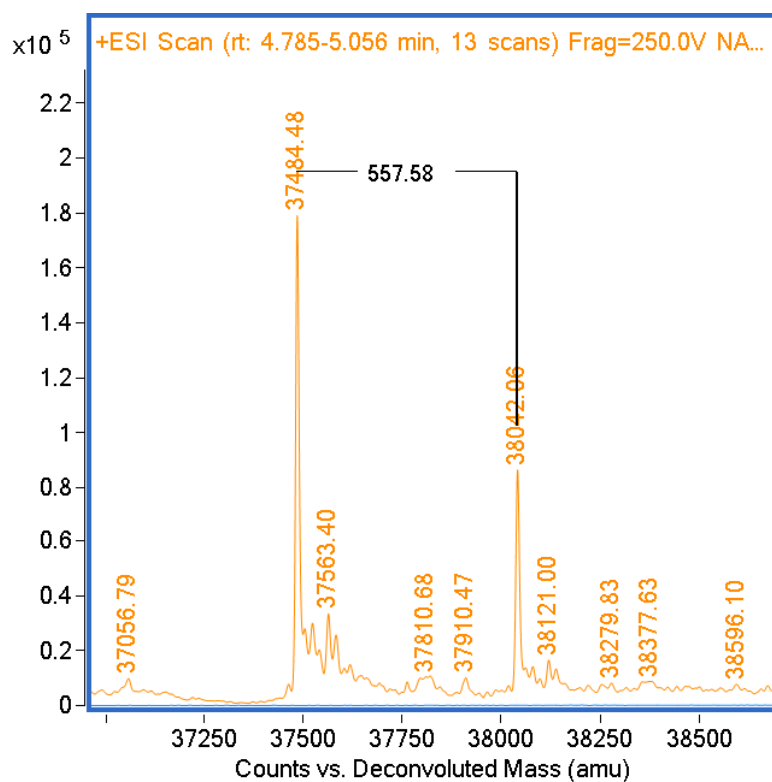

**Figure S4.** Protein mass spectrometry spectrum showing the addition of 557 Daltons to the protein, corresponding to the addition of the conjugate **48** without release of 5FU.

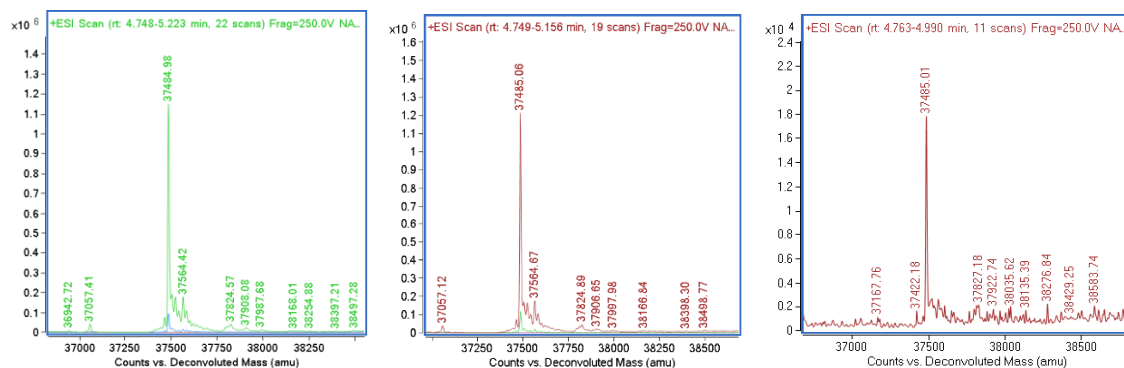

**Figure S5.** Protein mass spectrometry spectra of incubation of **49-51** with EGFR protein without release of 5FU.

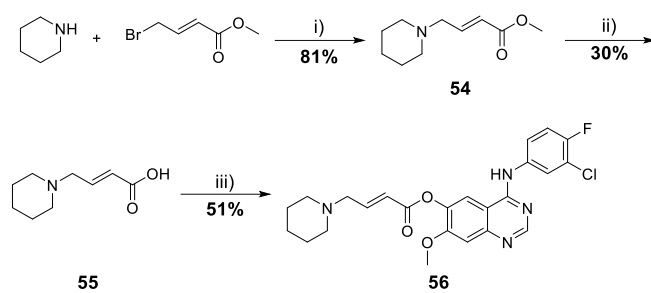

**Scheme S1.** Synthesis of the acrylate analogue of dacomitinib, **56**. Reagents and conditions: i)  $\text{K}_2\text{CO}_3$ , DCM, rt, 4.5 h; ii) 2 M aq. NaOH, THF, rt, 18 h; iii) %FU, DCC, DMAP; DMF, 0 °C-rt, 18 h.

a)

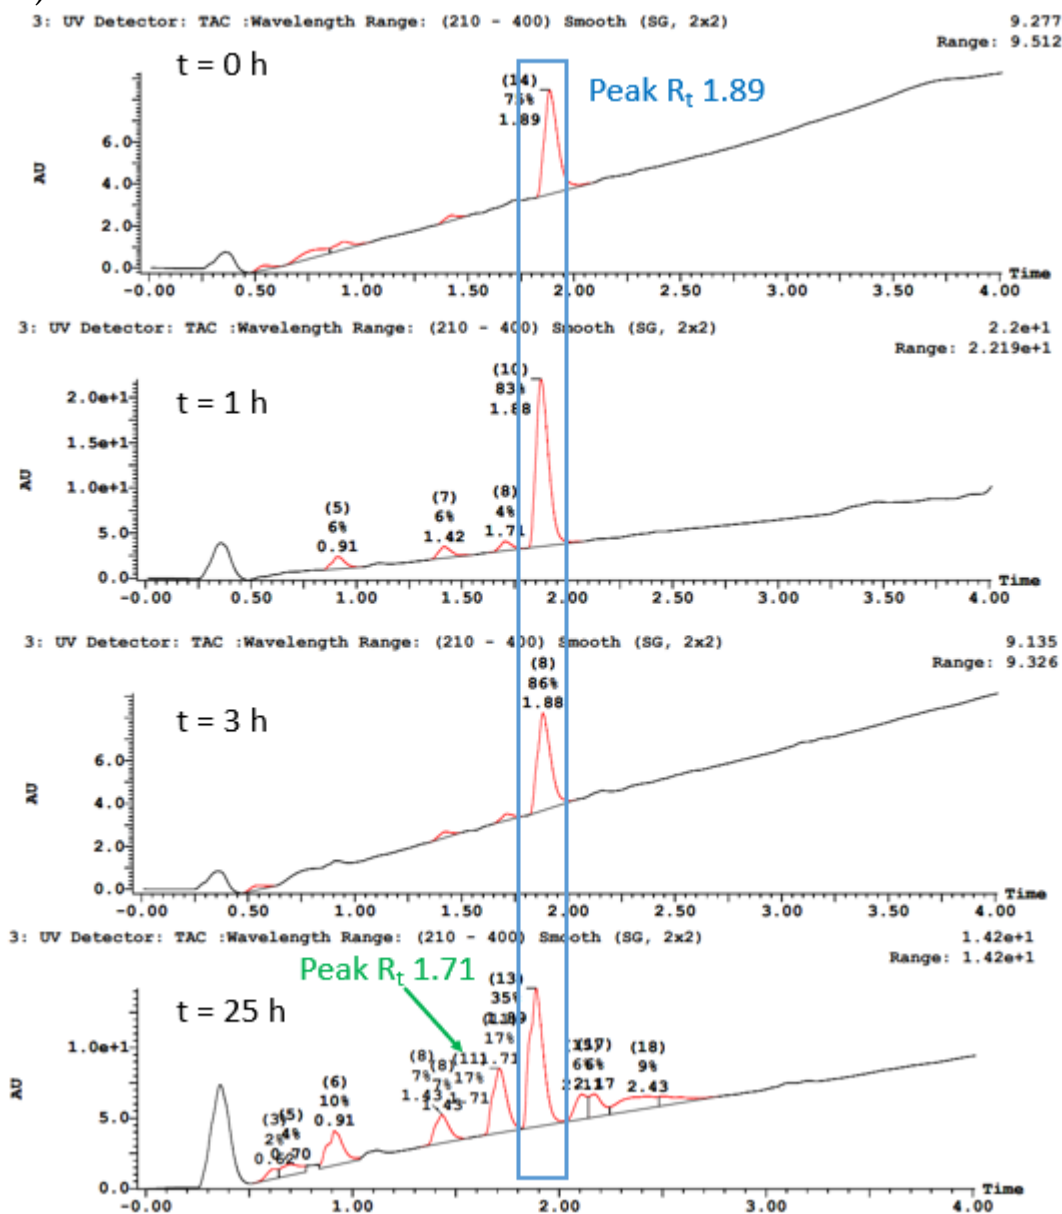

b)

Peak  $R_t$  1.89

Peak  $R_t$  1.71

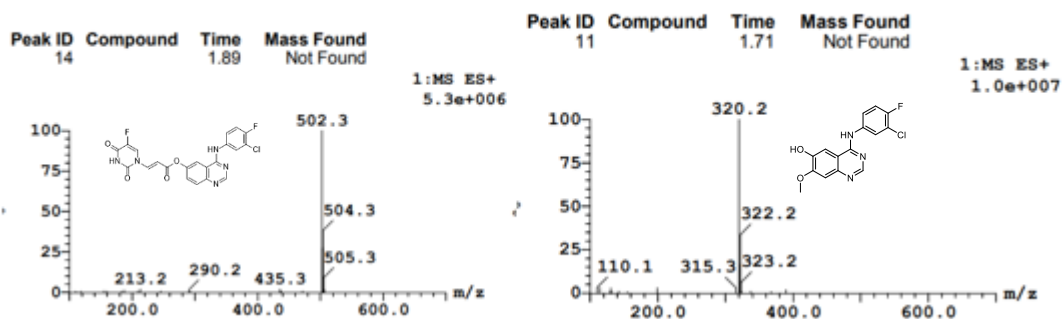

Figure S6. a) LCMS traces of compound 53 incubated in media and analyzed at t = 0, 1, 3 & 25 hours by LCMS analysis; b) mass spectra of main peaks and corresponding structures.

# NMR Spectra

## NMR data for compound 53

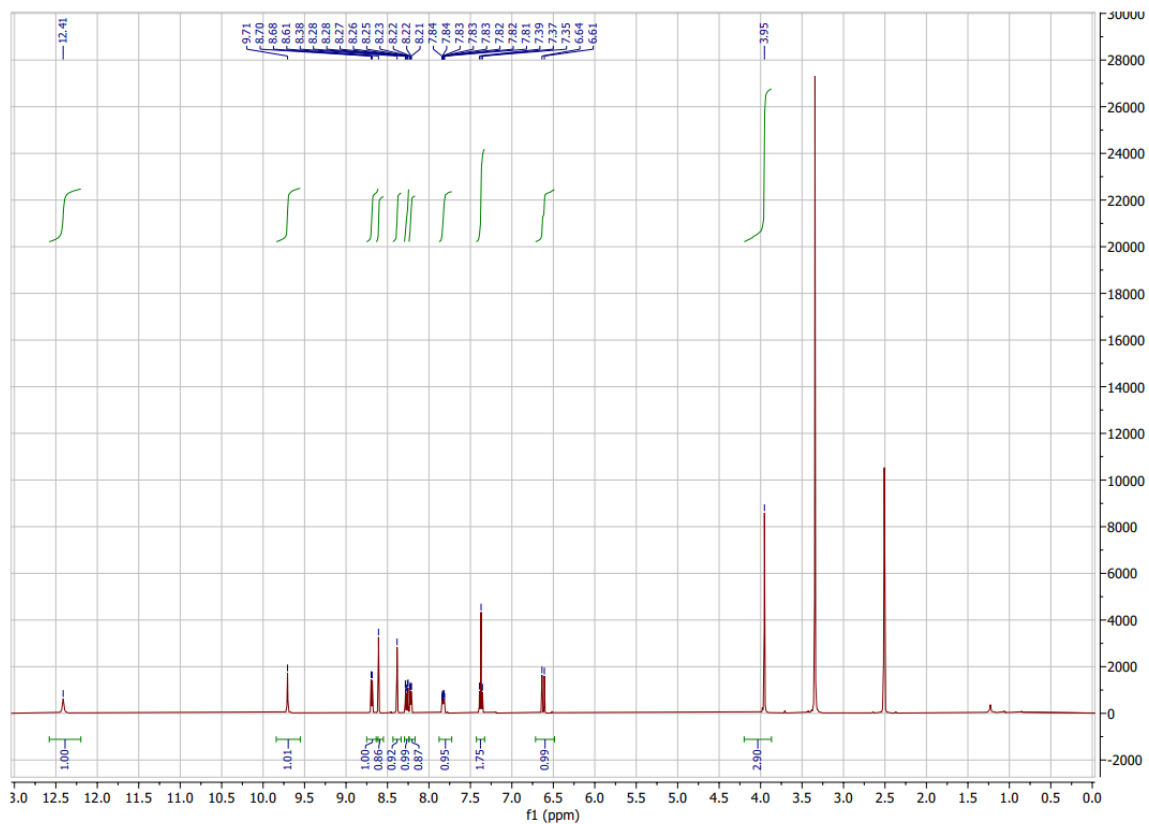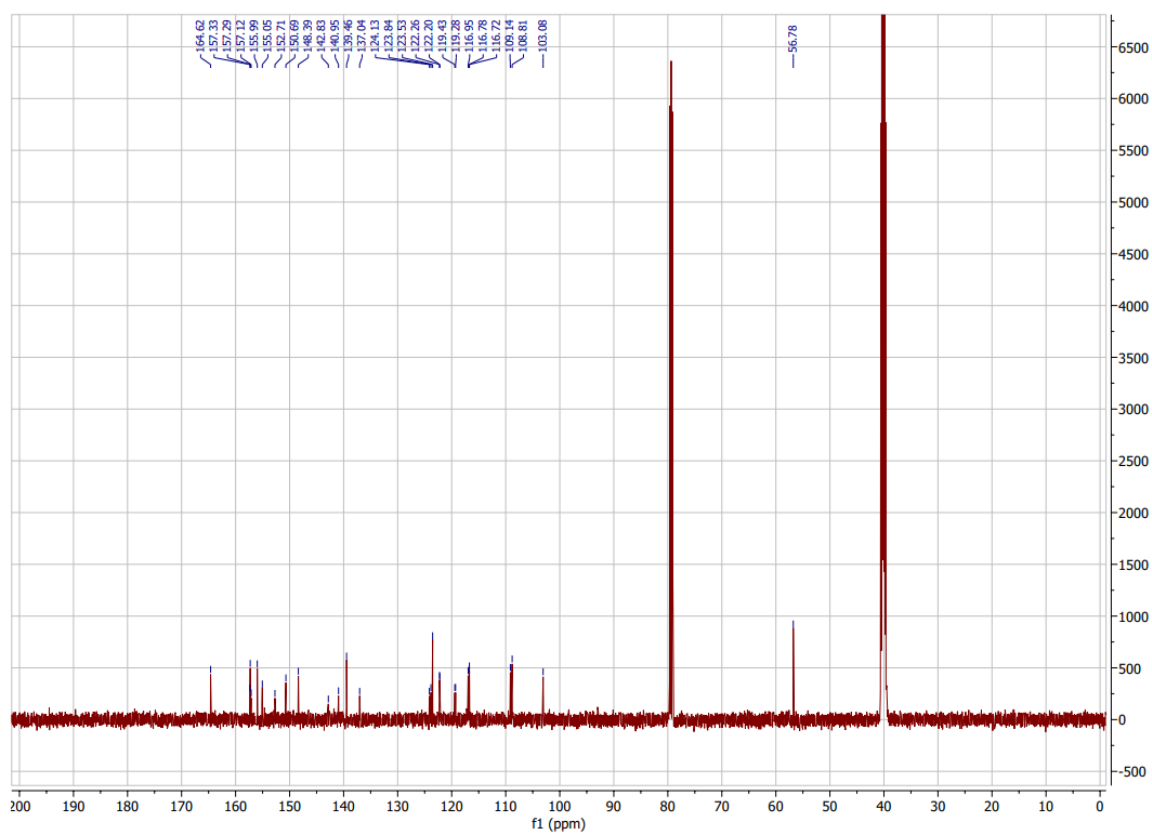

NMR data for compound 56

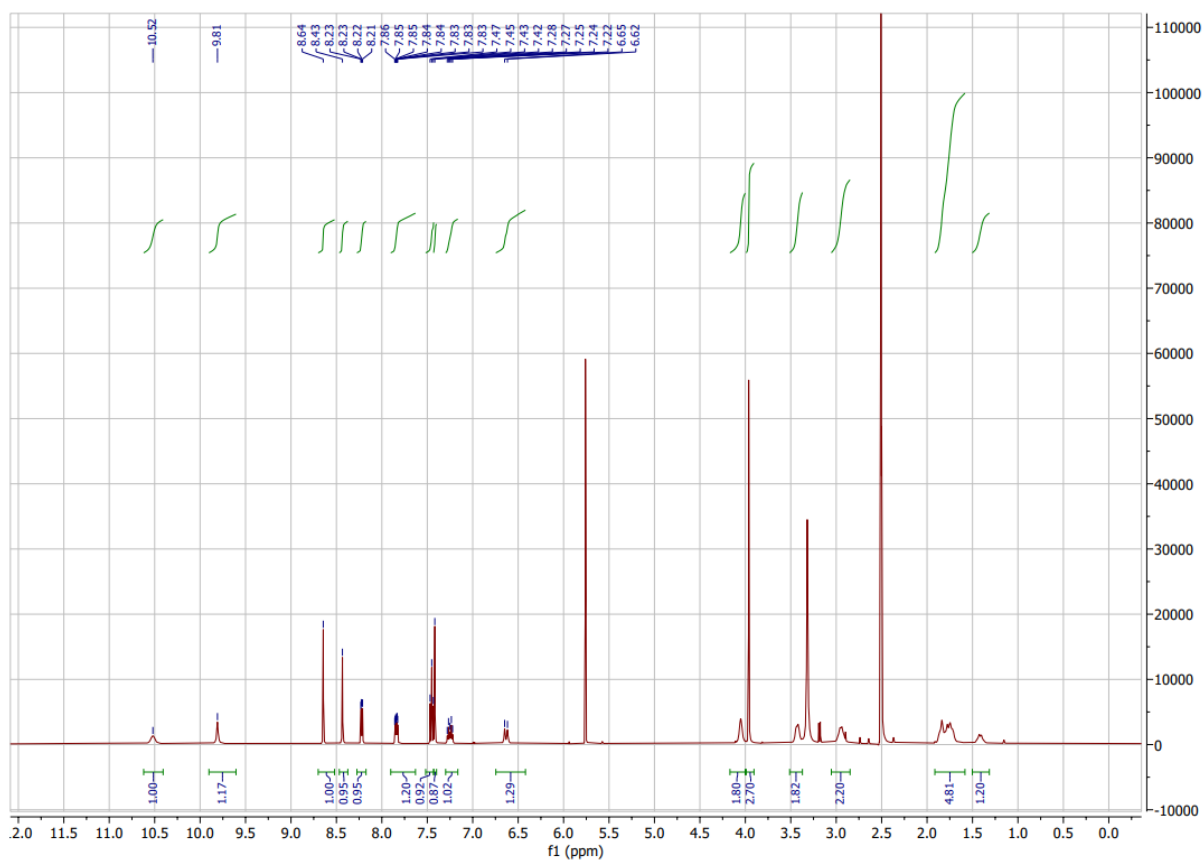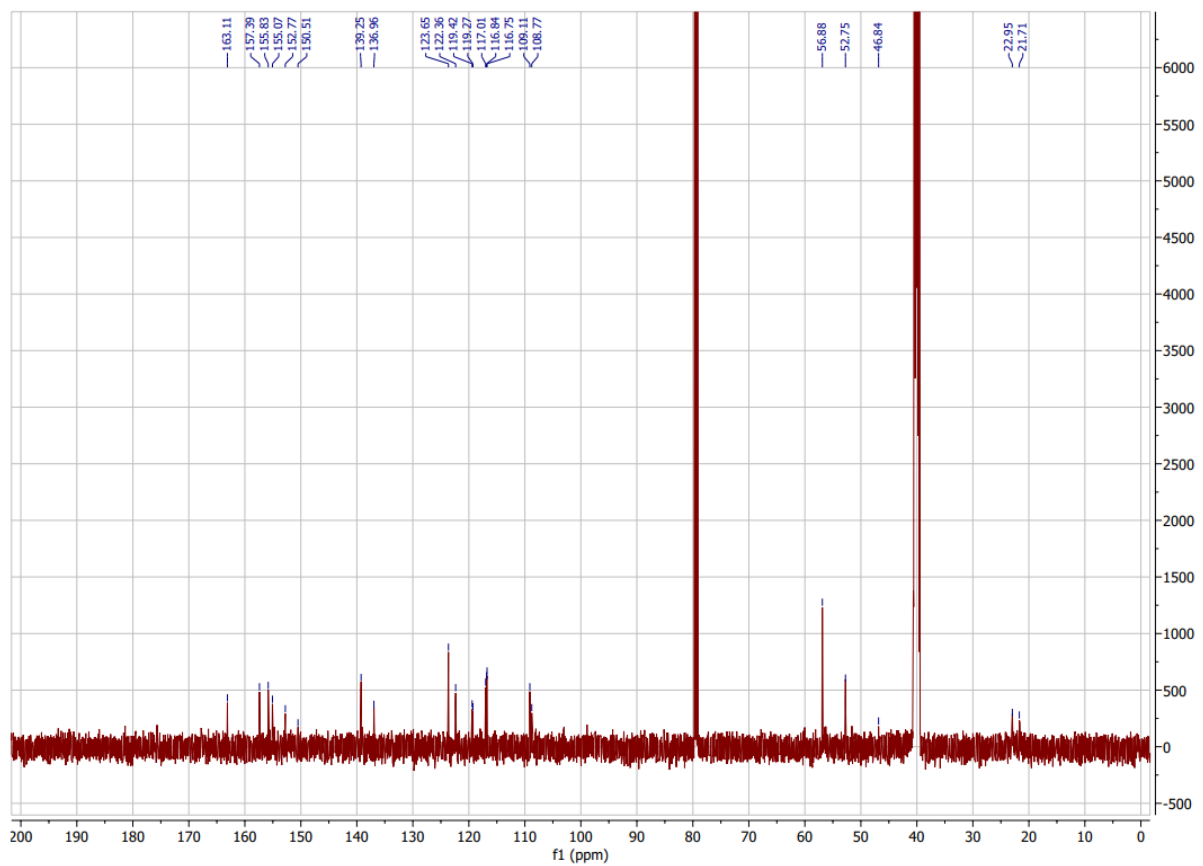



NMR data for compound 57

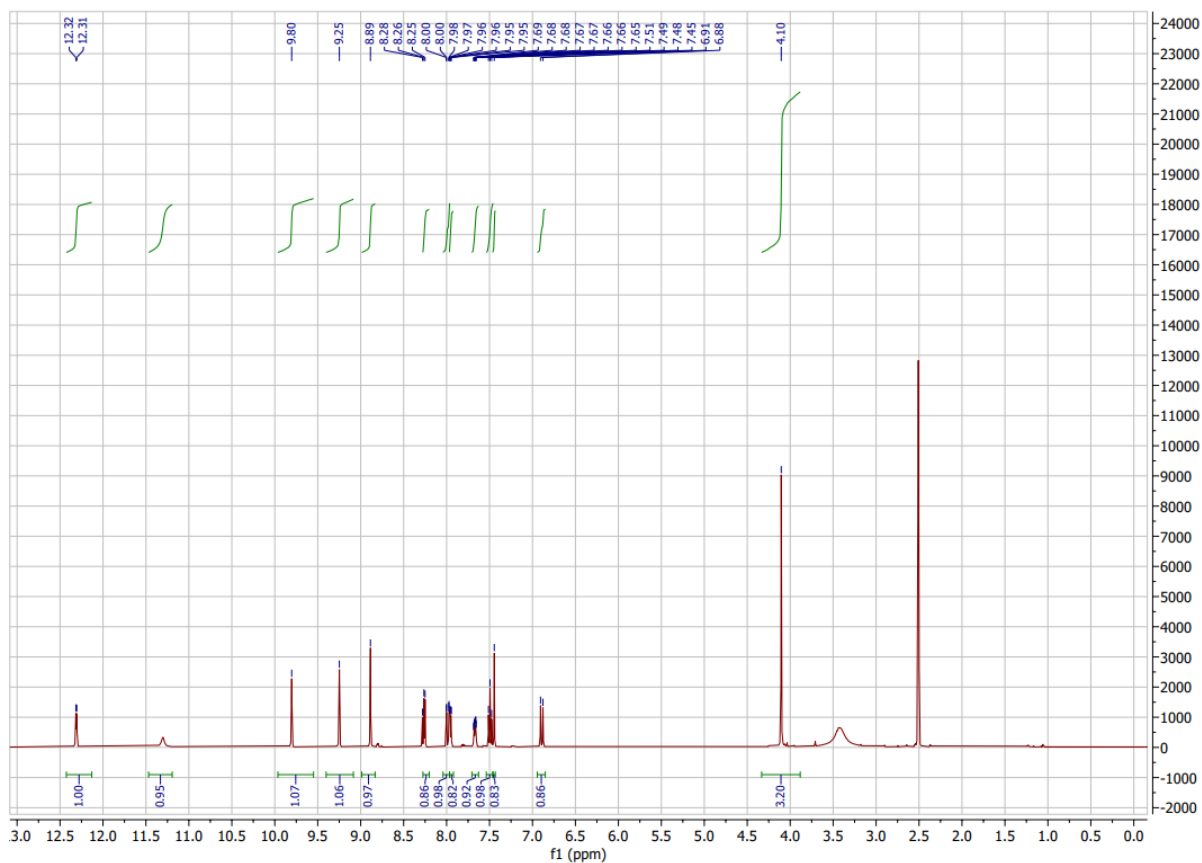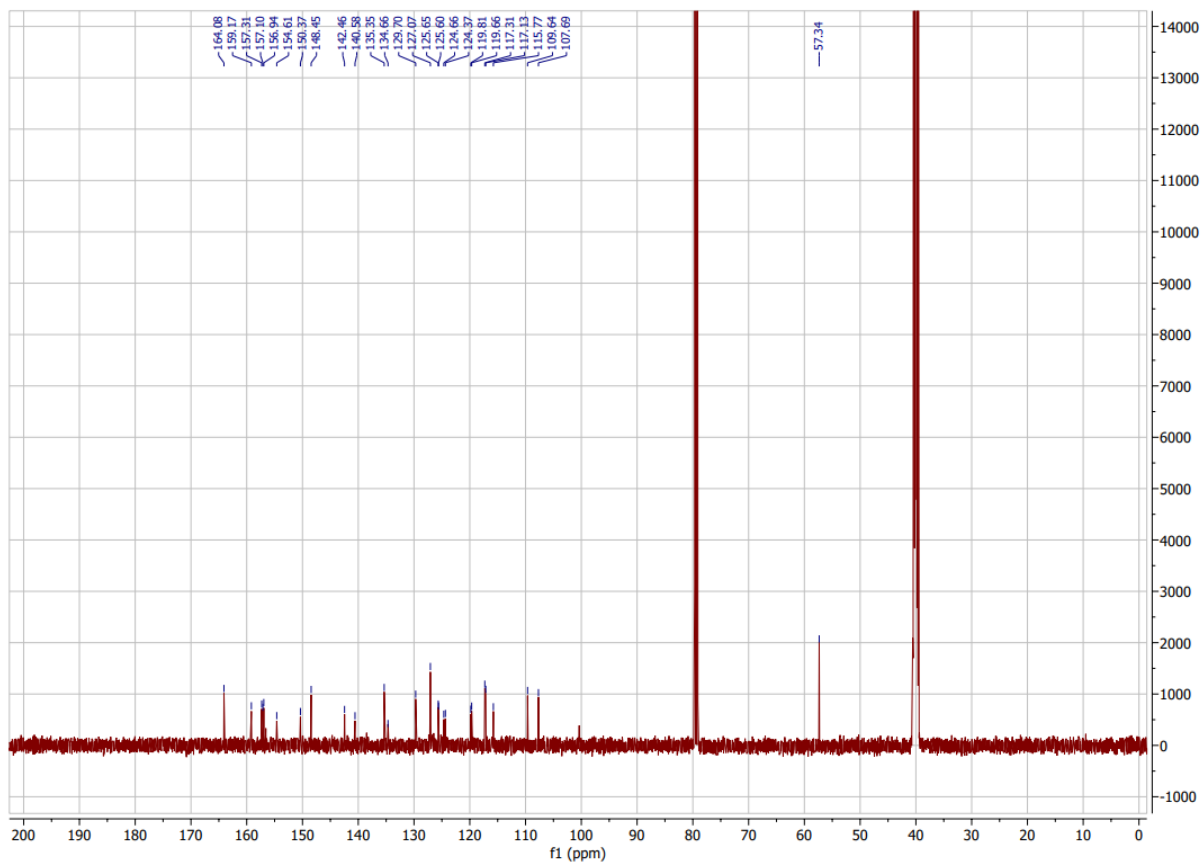

## Assignment of 5FU addition – Compound 16

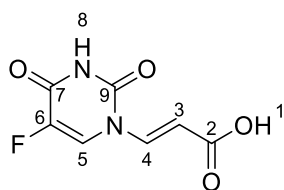

$^1\text{H}$  NMR (500 MHz, DMSO)  $\delta$  12.55 (s, 1H, H1/2), 12.29 (s, 1H, H1/2), 8.56 (d,  $J = 7.0$  Hz, 1H, H5), 7.96 (dd,  $J = 14.6, 1.8$  Hz, 1H, H4), 6.19 (d,  $J = 14.5$  Hz, 1H, H3).

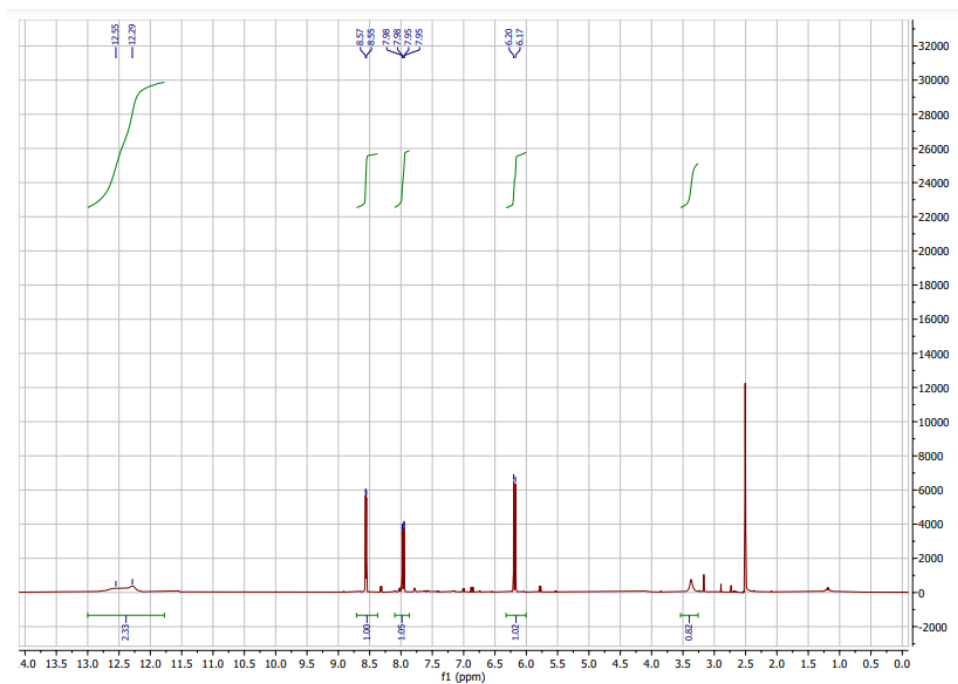

$^{13}\text{C}$  NMR (126 MHz, DMSO)  $\delta$  167.7 (C2), 157.4 (d,  $J = 26.5$  Hz, C7), 148.5 (C9), 142.6 (d,  $J = 235.7$  Hz, C6), 137.0 (C4), 124.3 (d,  $J = 36.8$  Hz, C5), 106.03 (C3).

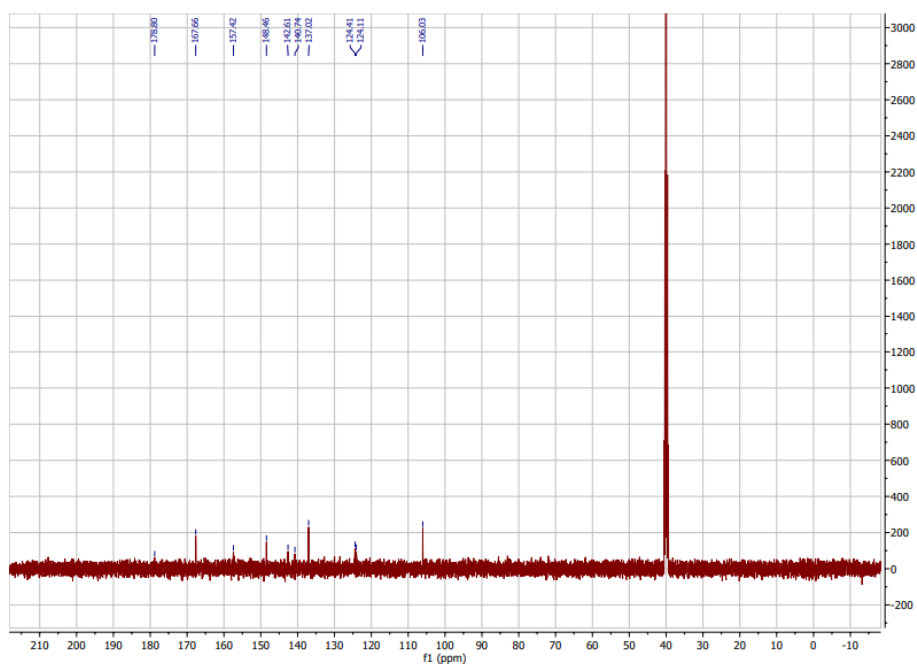

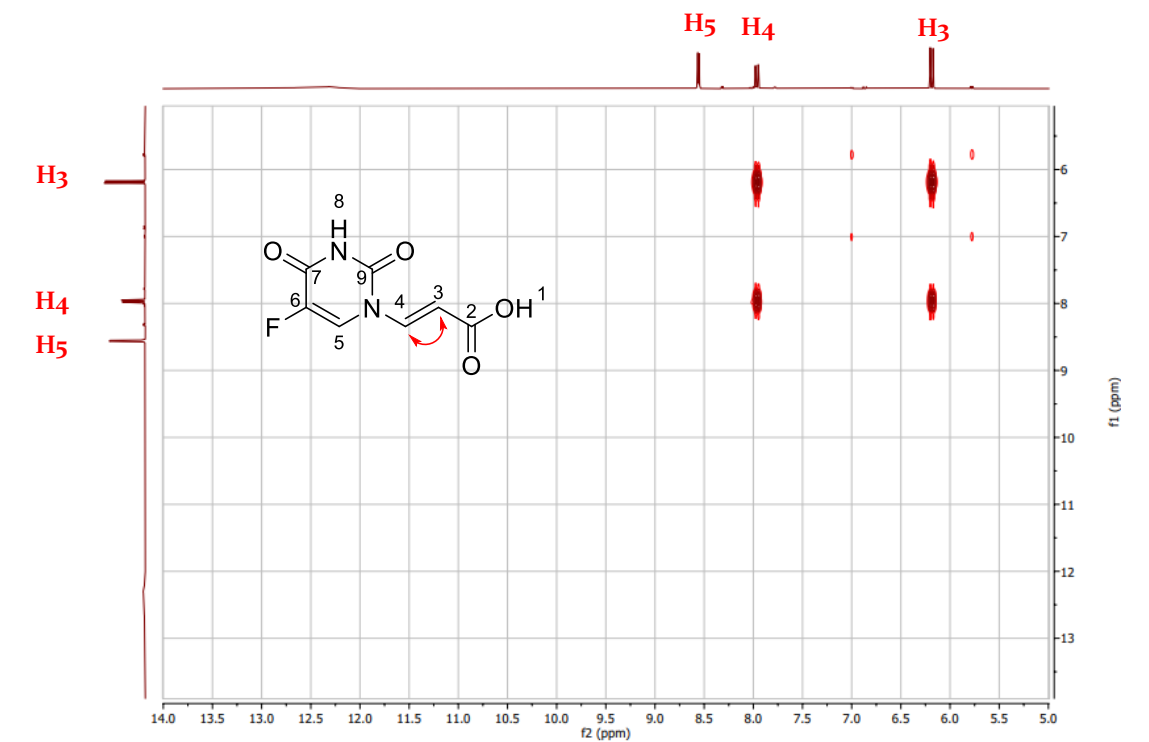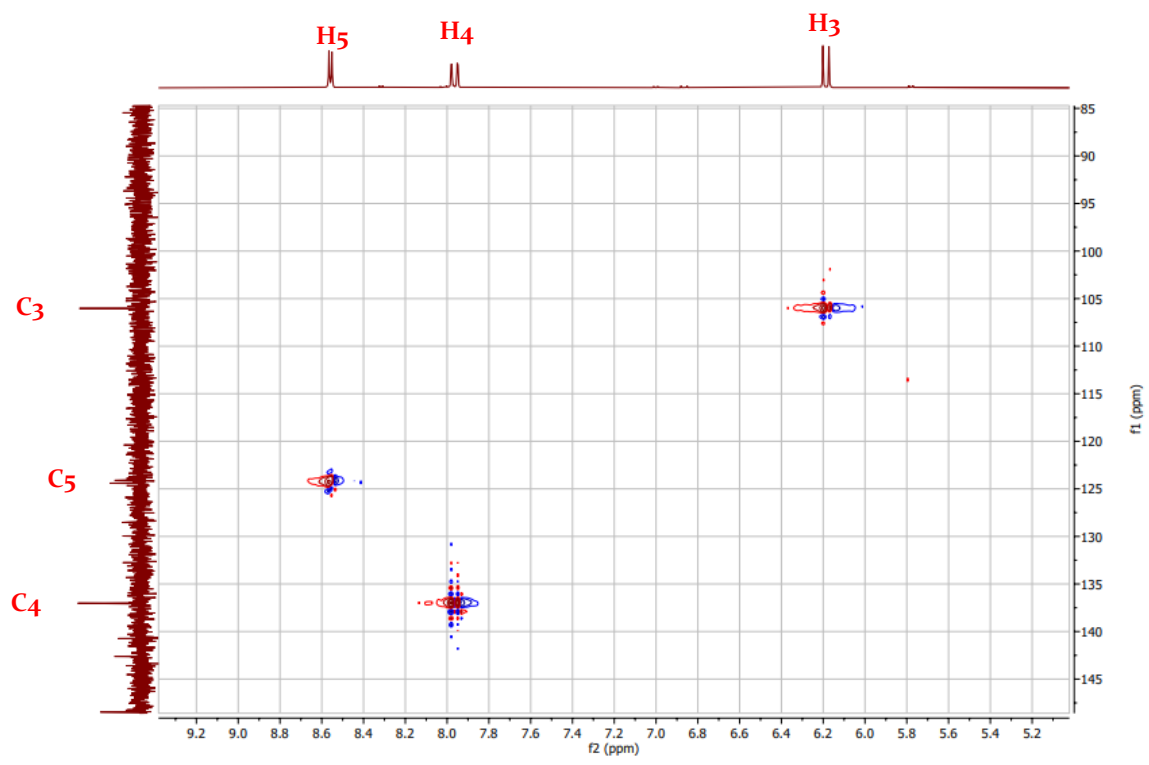

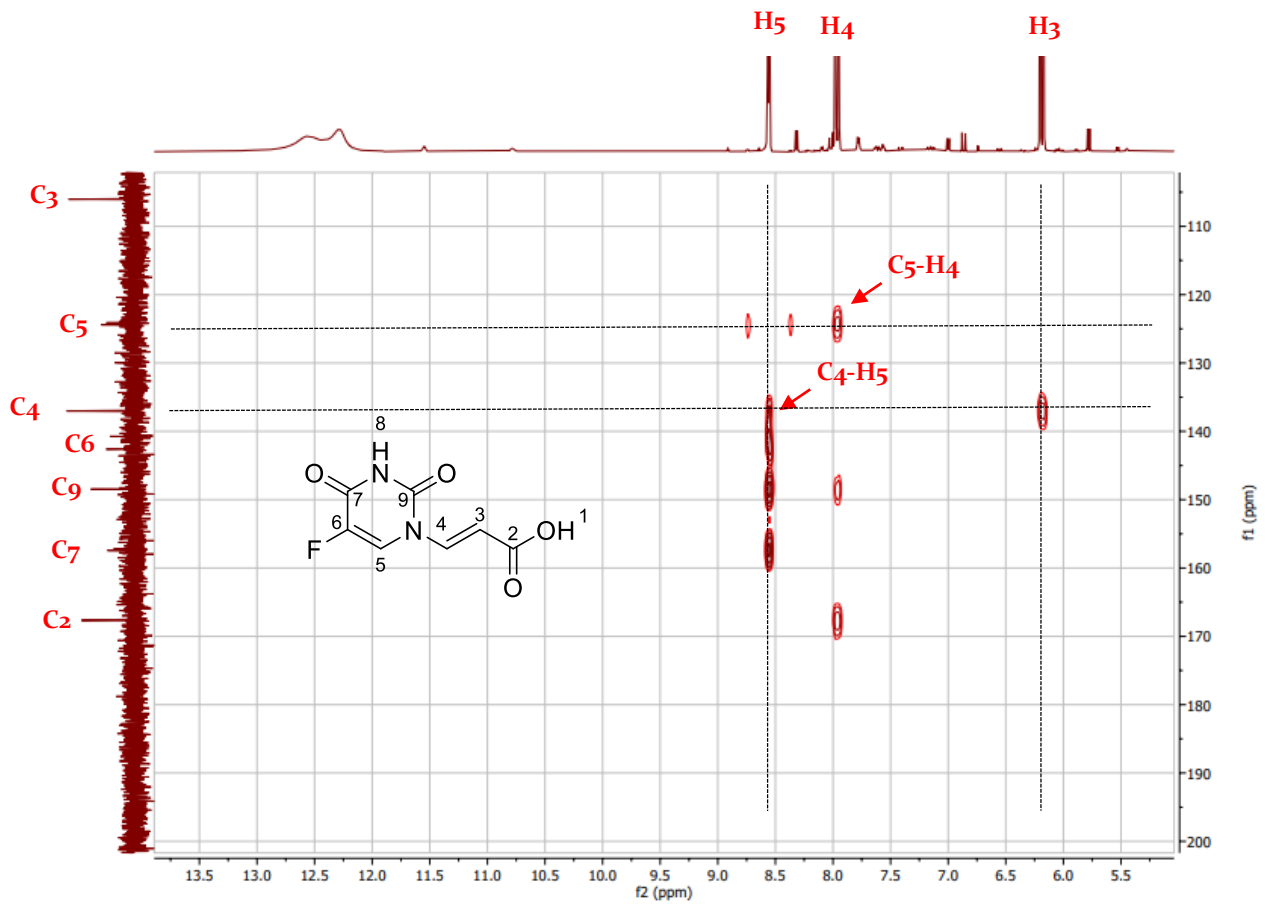

## Analytical HPLC Traces

### HPLC trace for compound 2

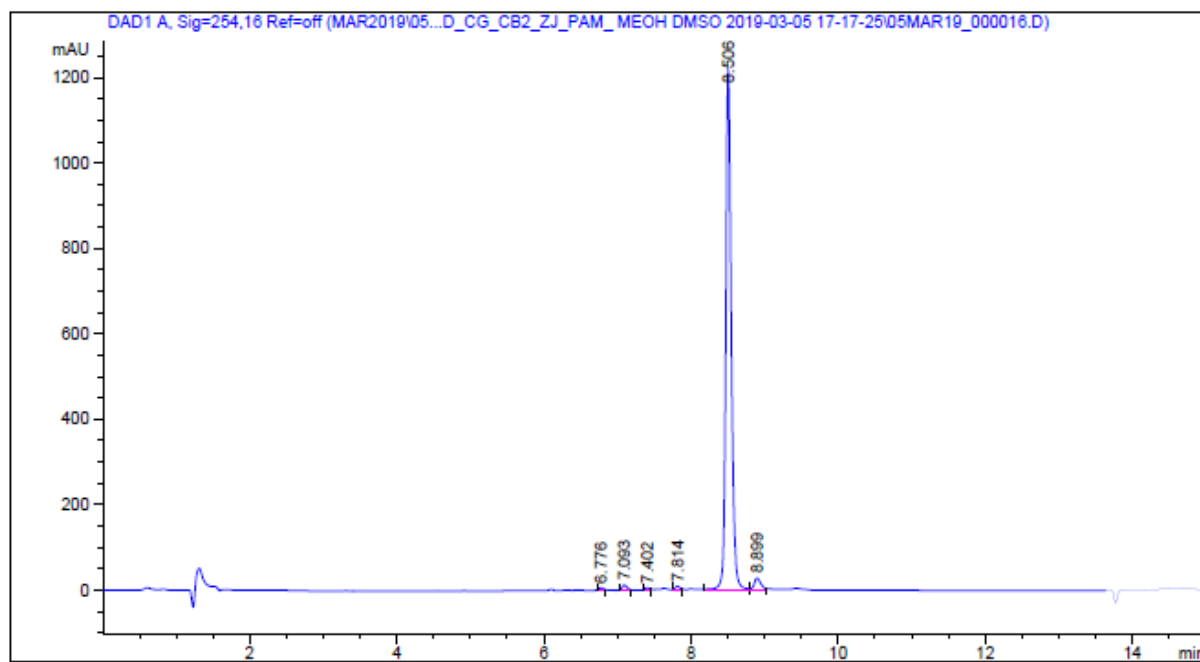

Peak area 95.0%

### HPLC trace for compound 53

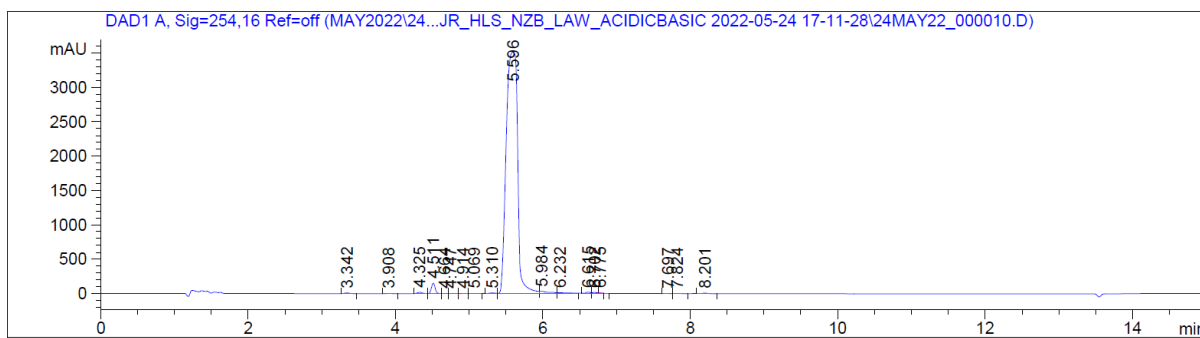

Peak area 96.2%

### HPLC trace for compound 56

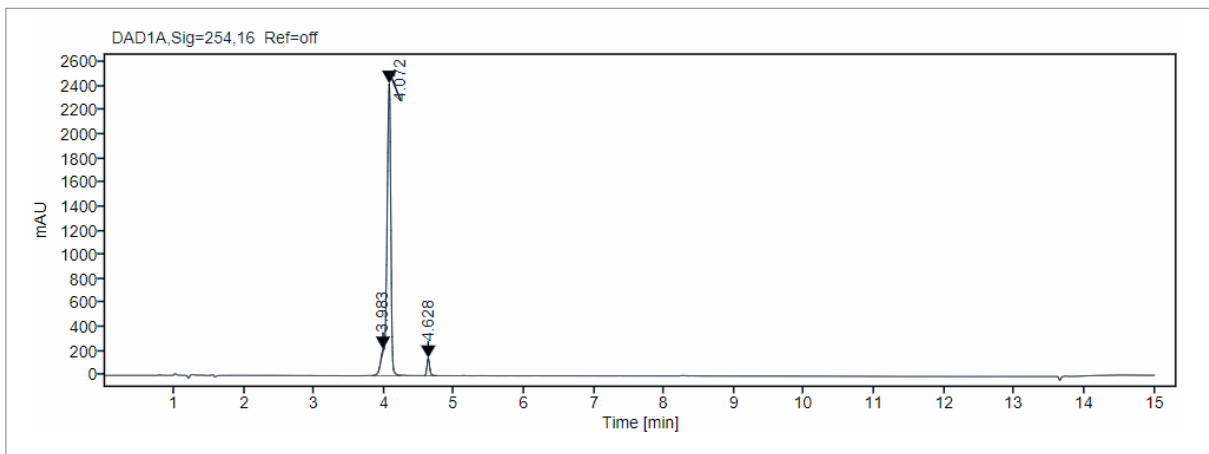

Peak area 95.6%

### HPLC trace for compound 57

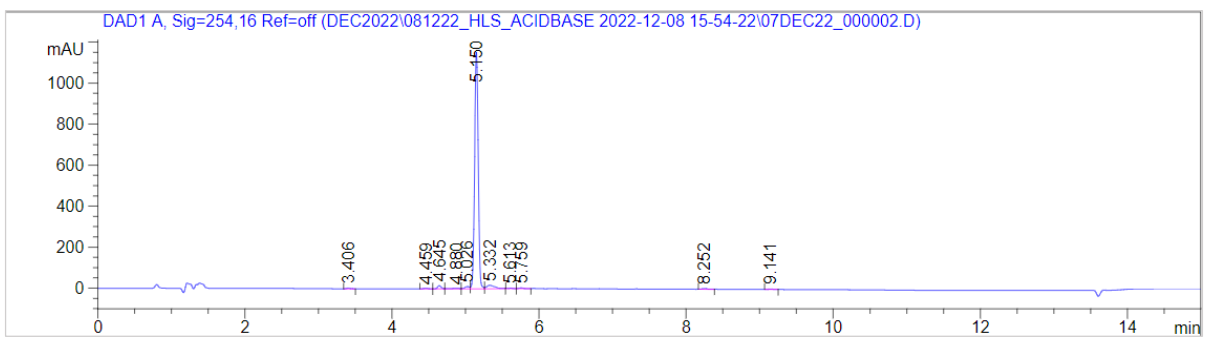

Peak area 94.2%
